# Supplementary material for: Microbial Symbionts in Insects Influence Down-Regulation of Defense Genes in Maize
Source: PLoS One. 2010 Jun 28;5(6):e11339. doi: 10.1371/journal.pone.0011339 (PMC2893166; doi:10.1371/journal.pone.0011339)
Supplement: Table S2 — Maize defense genes with significant differential expression. (0.05 MB XLS) [file pone.0011339.s002.xls]

## Sheet: Sheet1
Table S1. Maize defense genes with significant differential expression
		Relative expression			Pairwise p-value
ID	Experimental p-value	Control	WCR - tetracycline	WCR + tetracycline	Control vs. WCR - tetracycline	Control vs. WCR + tetracycline	WCR - tetracycline vs. WCR + tetracycline	Annotation
MZ00004486	3.33864e-06	0.286292	-0.708335	0.422044	0.00682732	0.668828	2.53671e-07	pathogenesis related protein-1
MZ00042168	9.64615e-10	0.276361	-2.00827	1.73191	0.000988036	0.0318272	1.09151e-07	pathogenesis related protein-1
MZ00040855	4.71221e-08	-0.194548	-1.22957	1.42412	0.00946874	1.6491e-05	2.17174e-07	pathogenesis related protein-1
PR-3 and PR-4 Chitinase
MZ00013897	6.04272e-08	0.605435	-1.26679	0.661353	0.00146974	0.909292	3.7088e-08	chitinase
MZ00025038	4.18169e-08	-0.138491	-0.497467	0.635958	0.0386283	0.000548315	3.18647e-07	pathogenesis-related protein 4
MZ00041276	8.12135e-05	0.132431	-1.00619	0.873756	0.0790764	0.226693	1.01384e-05	chitinase
MZ00043035	2.30909e-07	0.294999	-1.26578	0.970779	0.00445993	0.202551	1.3503e-06	chitinase
MZ00013319	4.98268e-07	0.501687	-0.821898	0.826917	0.00412154	0.420084	8.35786e-08	chitinase
MZ00021210	1.3488e-07	0.204623	-0.0135934	0.962833	0.193142	0.000607056	7.68177e-07	chitinase
MZ00042332	2.02046e-06	-0.293489	-0.393564	0.687053	0.386397	4.36765e-06	1.00971e-06	chitinase
MZ00033428	1.39258e-05	0.34643	-1.42077	1.07434	0.0130633	0.23511	1.58617e-06	putative chitinase
PR-5 Thaumatin-like proteins
MZ00000977	1.44796e-07	-0.141938	-0.373864	0.515802	0.0642153	9.63731e-06	8.10761e-08	antifungal thaumatin-like protein
MZ00013547	8.50528e-07	-0.0390832	-1.00381	1.04289	0.0140392	0.00723947	3.63865e-07	thaumatin-like protein
MZ00040435	1.60649e-06	-0.399006	1.14637	-0.747365	0.000232379	0.20423	6.31274e-06	putative thaumatin-like protein
MZ00013285	5.7097e-05	-0.0567753	-0.393251	0.450027	0.161564	0.0292393	1.4982e-05	thaumatin-like protein
MZ00040435	1.60649e-06	-0.399006	1.14637	-0.747365	0.000232379	0.20423	6.31274e-06	putative thaumatin-like protein
PR-6 and PR-7 Proteinase inhibitors/ proteinases
MZ00044339	2.00108e-05	0.266434	-0.534515	0.268081	0.0050803	0.99478	8.44487e-06	cysteine proteinase inhibitor Scb
MZ00035455	3.79717e-08	-0.131639	-0.872171	1.00381	0.0177871	0.00121866	3.50767e-08	cysteine proteinase CP1
MZ00038348	1.423e-05	0.436736	-0.927396	0.49066	0.00157606	0.889925	2.58045e-05	cathepsin B-like cysteine proteinase
MZ00002045	3.39024e-05	-0.0932104	-0.349063	0.442274	0.0725066	0.000769862	8.7648e-06	aspartic proteinase nepenthesin I
MZ00025326	4.55679e-05	-0.0783903	-0.463477	0.541867	0.158326	0.040347	2.60987e-05	aspartic proteinase
MZ00036333	8.23407e-07	0.554137	-1.96349	1.40936	0.00432778	0.248792	4.58225e-08	putative Sip1 protein
PR-8 Class III chitinase
MZ00018372	1.89814e-08	-0.0918683	-0.503691	0.595559	0.00134335	5.76422e-06	3.17525e-09	class III chitinase RCB4
MZ00013315	5.83376e-07	0.0702219	-0.73177	0.661548	0.000885454	0.0213601	8.30066e-07	putative class III chitinase
MZ00037339	1.62653e-07	0.0341822	-0.646909	0.612727	0.00280736	0.013717	1.72231e-07	chitinase III
PR-9 peroxidases
MZ00012518	8.79392e-10	-0.295615	-0.782906	1.07852	0.0211326	1.24649e-07	1.72232e-09	peroxidase prx15 precursor
MZ00021144	1.61185e-07	-0.101062	-0.484892	0.585953	0.00591296	0.000160871	1.16121e-07	putative Peroxidase 1 precursor
MZ00036720	4.41997e-07	-0.233281	-1.90109	2.13437	0.0175098	0.00074267	2.04543e-07	peroxidase
MZ00027710	1.50063e-10	1.8654	-0.269226	4.29454	0.00352538	0.00137755	1.96339e-12	putative peroxidase
MZ00027194	7.11609e-09	2.5513	0.0724501	3.96909	0.00211555	0.0444543	1.03539e-10	putative peroxidase
MZ00004650	5.85098e-10	0.0450548	-1.01169	0.653226	0.000374133	0.0215366	1.47764e-09	putative peroxidase
MZ00026737	6.60688e-08	0.518472	-1.08072	1.92925	0.0107234	0.0184091	3.12875e-09	peroxidase
MZ00027284	1.17695e-07	1.64292	-0.0605069	2.91244	0.00887401	0.0399557	1.77777e-08	probable peroxidase
MZ00022313	0.0369086	-0.522941	-0.801293	0.527168	0.193298	0.000334777	1.11593e-06	putative peroxidase
MZ00022582	1.24494e-06	0.862422	0.564532	1.92982	0.224886	0.00029799	1.09589e-06	peroxidase 1 precursor protein
MZ00022862	4.55397e-08	-0.204433	0.0120701	2.0542	0.531431	1.56418e-07	2.82292e-06	class III peroxidase
MZ00016005	0.606531	0.310382	-0.889502	1.58071	0.00111657	0.000887738	3.79651e-10	peroxidase
MZ00028399	2.74732e-07	0.461408	0.509254	3.08265	0.853538	1.06841e-07	1.75696e-07	putative peroxidase
MZ00000932	0.564585	0.538542	-0.631691	1.77146	0.0158209	0.00611649	5.22365e-07	peroxidase 1 precursor
MZ00056406	9.66601e-13	0.00373033	-2.03948	2.03575	0.000544924	0.000630266	1.91965e-12	putative peroxidase
MZ00044248	9.09579e-09	-0.519974	-1.02688	1.54686	0.156685	1.40731e-06	4.14599e-08	putative peroxidase
MZ00042699	2.22012e-11	0.0344868	-1.92519	1.89071	0.000837403	0.00129953	1.45448e-12	putative peroxidase
MZ00033093	3.47335e-08	-0.0160121	-1.55862	1.57463	0.00477658	0.00518875	3.39379e-08	putative peroxidase P7X
MZ00004650	2.06305e-08	0.118491	-0.876186	0.757695	0.000101835	0.00704602	9.8601e-09	putative peroxidase
PR-10 Ribonucleases
MZ00027915	1.0087e-06	-0.0518726	-1.1261	1.17797	0.0023557	0.000633588	2.11027e-07	pathogenesis-related protein 10
MZ00028247	2.39986e-11	0.498316	-2.62245	2.12414	0.000148221	0.0257069	1.12822e-09	putative aleurone ribonuclease
MZ00019596	1.02253e-05	0.176176	0.190769	-0.366945	0.89177	0.000167115	8.33727e-06	endoribonuclease L-PSP family protein
PR-12 Defensins
MZ00043949	1.99981e-07	0.0855667	-1.05327	0.967708	0.00122322	0.0234483	2.14732e-06	defensin 1 precursor
PR-13 Thionins
MZ00016209	4.53434e-06	0.440212	-0.770112	0.3299	0.000859444	0.704951	7.38717e-07	Thionin
PR-14 Lipid transfer proteins
MZ00003835	1.13604e-06	0.336757	-1.67161	1.33486	0.0192621	0.210177	9.20999e-08	putative lipid transfer protein
MZ00041611	3.89135e-08	-0.301799	-1.1039	1.4057	0.0396229	4.22772e-05	9.02293e-08	lipid-transfer protein precursor
MZ00028450	3.81221e-07	4.97296	3.61081	6.88517	0.0256673	0.00375442	2.60201e-07	putative lipid transfer protein
Glycoproteins
MZ00016315	3.02123e-05	0.0773534	0.252622	-0.329975	0.198492	0.00611409	1.22663e-05	hydroxyproline-rich glycoprotein DZ-HRGP
MZ00057018	5.23395e-06	-0.041648	0.449767	-0.40812	0.00967113	0.0149073	1.38022e-05	hydroxyproline-rich glycoprotein-like
Protease inhibitors
MZ00044388	2.17654e-07	0.0265095	-1.56254	1.53603	0.00804333	0.00947672	9.55382e-08	putative protease inhibitor
MZ00039775	1.73511e-05	0.102807	-0.483538	0.38073	0.00856454	0.182776	7.3431e-06	xylanase inhibitor protein I
MZ00036538	2.5708e-10	-0.415356	-2.10232	2.51768	0.00408855	9.98253e-07	8.87685e-09	subtilisin/chymotrypsin inhibitor
MZ00041242	1.919e-06	-0.0286515	-0.861485	0.890137	0.0243715	0.00552718	2.79368e-06	cysteine protease
MZ00014433	0.00255235	-0.0536423	-0.444235	0.497877	0.250152	0.132953	0.000896773	Putative xylanase inhibitor protein
MZ00025431	1.21846e-05	-0.0324391	-0.73077	0.76321	0.0371965	0.0288251	7.22903e-06	Bowman-Birk type trypsin inhibitor
MZ00011113	1.0007e-06	0.0171593	0.158414	0.693934	0.298762	0.000195406	1.28471e-06	OTU-like cysteine protease-like
MZ00057049	9.03493e-09	0.739036	-2.06462	1.32559	0.000505783	0.396183	7.70169e-08	putative protease inhibitor
MZ00043179	4.02485e-09	-0.115906	-1.84501	1.96092	0.000899119	0.000144505	1.78913e-09	subtilisin/chymotrypsin inhibitor
MZ00037253	1.04347e-11	-0.0518534	-1.77025	1.8221	0.000198093	9.56827e-05	2.08999e-11	subtilisin/chymotrypsin inhibitor
MZ00036636	9.31034e-06	-0.22862	-0.340464	0.569083	0.364632	3.88351e-05	3.61859e-06	probable trypsin inhibitor
MZ00010105	2.39791e-06	-0.144711	-0.239524	0.384235	0.425016	4.07055e-05	7.63881e-06	putative protease inhibitor
MZ00005891	5.44623e-08	-0.219053	-0.754603	0.973657	0.0103446	9.27756e-06	1.17256e-08	Subtilisin inhibitor I (ASI-I)
Lignins
MZ00020156	8.51261e-08	-0.596856	-1.152	1.74885	0.222061	3.96522e-05	6.76426e-08	putative cinnamyl alcohol dehydrogenase
MZ00005428	1.75765e-06	-0.814268	0.0162899	0.797978	2.87887e-05	5.18699e-06	0.00560383	4-hydroxycinnamic acid-CoA ligase
MZ00044023	5.72759e-07	-0.0326312	-0.695514	0.728145	0.00733494	0.00388009	2.40153e-07	cinnamoyl-CoA reductase
MZ00000781	6.12073e-08	1.46096	-0.0710067	3.57397	0.0231911	0.0022752	1.40715e-08	caffeoyl-CoA O-methyltransferase 1
MZ00013937	4.12649e-08	2.05848	0.629989	3.29555	0.00299257	0.00946524	4.01596e-08	glutathione transferase III
MZ00004041	9.16084e-10	-0.0403798	-0.677185	0.717565	0.00434463	0.00177872	5.09457e-09	Phenylalanine ammonia-lyase
MZ00014292	1.21327e-07	1.32518	1.17489	3.59778	0.703548	4.92227e-07	3.36819e-06	phenylalanine ammonia-lyase
MZ00012815	5.10447e-08	0.745376	-0.0829309	1.9201	0.0176878	0.000519904	2.07021e-07	putative cinnamoyl-CoA reductase
MZ00004477	1.13762e-06	0.883016	-0.964773	1.92636	0.00465623	0.0622563	1.55228e-07	N-hydroxycinnamoyl/benzoyltransferase
MZ00025478	4.92643e-07	0.921875	0.181506	2.4857	0.026102	0.000549314	1.56573e-06	cinnamyl-alcohol dehydrogenase
MZ00021835	1.60863e-05	1.74355	-0.302533	2.27295	0.0129316	0.466017	1.9603e-06	N-hydroxycinnamoyl/benzoyltransferase
MZ00017952	5.78156e-06	0.328853	0.0779008	0.753542	0.0709214	0.00359851	2.71333e-06	putative Caffeoyl-CoA O-methyltransferase
MZ00014812	1.06632e-06	1.51136	0.121048	2.95847	0.0185435	0.00899692	2.86879e-07	putative cinnamyl alcohol dehydrogenase
MZ00025513	1.33144e-05	-0.556504	-0.466335	1.02284	0.724816	1.38685e-05	1.24606e-05	cinnamic acid 4-hydroxylase
Flavanoids
MZ00028764	9.8784e-07	0.0752646	-0.463046	0.387781	0.00369352	0.0517709	2.9953e-07	dihydroflavonol4-reductase
MZ00013937	4.12649e-08	2.05848	0.629989	3.29555	0.00299257	0.00946524	4.01596e-08	glutathione transferase III
MZ00012636	1.62276e-10	-0.245725	-0.397848	0.955951	0.349449	1.8998e-08	1.48019e-08	glutathione S-transferase GST 29
MZ00026160	9.15326e-07	0.796596	-0.609773	1.92247	0.00426089	0.0373681	4.2506e-06	glutathione S-transferase GST 30
MZ00030444	1.03384e-07	1.49225	0.764887	1.95387	0.00947902	0.0734425	4.09101e-09	putative glutathione S-transferase
MZ00026581	2.76113e-05	-0.313218	-0.309545	0.622763	0.981452	1.84803e-05	2.65158e-05	putative flavonol synthase
MZ00041712	5.76585e-10	-0.384604	-0.436797	0.821401	0.672491	1.16535e-09	4.39826e-09	glutathione S-transferase GST 8
Lipoxygenase (LOX)
MZ00000005	4.06792e-05	-0.390496	-0.67223	1.06273	0.147809	6.2507e-05	8.81323e-06	lipoxygenase
Silencing and Chromatin remodeling
MZ00018389	1.46881e-06	-0.078698	0.270098	-0.1914	0.00824019	0.3296	8.71247e-08	putative Helicase SKI2W
MZ00024006	8.32814e-08	0.192113	0.469664	-0.661777	0.120739	0.000182451	9.94029e-08	putative RNA helicase
MZ00033520	5.25203e-08	-0.0470726	0.476042	-0.428969	0.00475499	0.0317232	2.65014e-08	centromere protein-like
MZ00013519	3.39202e-06	-0.0259311	-0.861425	0.887357	0.0229412	0.00789462	2.35599e-06	Histone H2B.3.
MZ00018230	4.19293e-06	0.112854	0.328831	-0.441684	0.214862	0.00383145	1.82823e-06	cleavage and polyadenylation specific factor
MZ00024529	8.62157e-07	0.33793	0.44535	-0.78328	0.661908	1.57726e-05	2.16761e-05	probable DNA (cytosine-5-)-methyltransferase
MZ00025631	2.87265e-05	-0.154632	0.55266	-0.398028	0.00255908	0.220097	1.21799e-05	putative ethylene-responsive RNA helicase
MZ00039022	9.46027e-05	-0.0560773	0.264458	-0.208381	0.0329961	0.262469	1.68909e-05	putative DEAD box-like RNA helicase
MZ00041692	9.10523e-06	-0.0505139	0.522402	-0.471888	0.00440243	0.00532144	1.10567e-05	putative chromosome region maintenance protein
MZ00013642	2.60989e-05	-0.13699	0.663324	-0.526334	0.000310675	0.0426649	7.23173e-06	putative histone H2A protein
MZ00014415	1.26366e-05	-0.103691	0.457444	-0.353752	0.0010957	0.0483917	9.28501e-06	minichromosome maintenance deficient protein 5
MZ00014892	9.06524e-07	-0.0573415	0.45207	-0.394729	0.00250983	0.00788178	4.11435e-06	putative pre-rRNA processing protein RRP5
MZ00016076	1.00748e-05	-0.242342	0.512375	-0.270033	1.73571e-05	0.761475	9.67827e-06	putative Hec1 protein
MZ00042841	1.81163e-07	3.11877	0.645254	-3.76402	0.0281766	2.14861e-06	8.26671e-06	Histone H2A
MZ00029746	1.77292e-06	0.200647	0.447697	-0.648343	0.27569	0.000886093	1.16077e-06	putative RNA helicase
MZ00033520	5.25203e-08	-0.0470726	0.476042	-0.428969	0.00475499	0.0317232	2.65014e-08	centromere protein-like
MZ00001590	0.00230785	-0.274258	-0.0974372	0.371695	0.10968	0.000503424	0.00461955	AGO1
MZ00037830	0.00281363	0.05365	-0.192592	0.138942	0.0152973	0.38861	0.00109239	Putative anti-silencing factor 1-like protein
MZ00025730	0.400662	0.00158968	0.0621543	-0.063744	0.595136	0.537673	0.185545	HMGI/Y protein
MZ00016670	0.0239566	-0.000474779	0.117441	-0.116967	0.31585	0.215266	0.0128372	Parathymosin-like
MZ00022237	0.1145	0.0351358	0.075992	-0.111128	0.724207	0.232163	0.0438645	RNA helicase SDE3
MZ00036196	2.05208e-08	0.260232	0.610764	-0.870996	0.0784201	8.9425e-06	1.16118e-08	transcriptional co-repressor
MZ00025345	2.87219e-06	-0.102301	0.543957	-0.441656	0.000447847	0.00258208	4.0495e-06	transcriptional co-repressor
MZ00029711	2.96318e-06	-0.0566497	0.377065	-0.320415	0.00274805	0.0301046	2.13128e-06	putative isoleucyl-tRNA synthetase
MZ00043264	2.48146e-06	1.40018	0.566957	-1.96714	0.0455251	4.33098e-07	1.66046e-05	putative RNA helicase
MZ00051062	8.13788e-06	0.254746	0.235995	-0.490741	0.864867	4.32228e-06	9.95134e-06	putative DNA2-NAM7 helicase family protein
MZ00025021	1.71837e-05	0.154812	0.149253	-0.304065	0.945024	2.15017e-05	1.56402e-05	putative RNA helicase, DRH1
Misc. defense genes
MZ00043996	2.30747e-07	-0.162481	-0.946159	1.10864	0.0230816	0.000263293	2.69426e-07	Bax inhibitor-1
MZ00016498	4.25375e-09	-0.119018	-1.75728	1.8763	0.0016349	0.000155223	3.41618e-09	disease resistance response protein
MZ00020474	3.41539e-07	-0.00204035	0.345573	-0.343533	0.000313187	0.000910225	6.27826e-08	putative Arp2/3 complex 41kD subunit
MZ00015593	9.84868e-06	0.185308	-0.772238	0.58693	0.00513059	0.195275	4.00635e-06	ZmNAS1 nicotianimine synthase
MZ00032776	0.00622868	0.0236642	-0.304117	0.280453	0.0752821	0.134234	0.00176009	Putative disease resistance response protein
MZ00050488	0.0379995	0.00118505	0.114196	-0.115381	0.149102	0.0993184	0.0125645	Putative peptide deformylase
MZ00014229	1.02064e-05	-0.961841	-1.32023	2.28207	0.680995	0.000481721	2.00218e-05	pathogen-related protein
MZ00001975	6.21609e-06	-0.341085	-0.575382	0.916467	0.483256	0.000452175	1.23411e-05	putative disease resistance protein
MZ00033060	2.18753e-08	-0.0287623	-0.788298	0.81706	0.0106985	0.00661702	2.15148e-08	Pir7b bacterial defense related esterase
MZ00022294	4.54103e-12	0.19851	-1.21384	1.01533	7.81233e-05	0.00834912	7.70966e-12	putative esterase
MZ00016683	7.41321e-09	-0.17156	-1.03108	1.20264	0.00380461	0.000247178	7.68877e-08	pathogenesis-related protein-like protein
MZ00016541	1.32008e-08	-0.0559902	0.716426	-0.660436	0.000933322	0.00359311	1.24687e-08	N-carbamyl-L-amino acid amidohydrolase
MZ00014156	9.34505e-07	0.251087	1.3501	-1.60119	0.0107722	0.000449329	2.97217e-07	translational elongation factor EF-TuM
DIMBOA Pathway
MZ00015236	1.95218e-07	3.0819	2.10015	5.06733	0.0725058	0.000883327	4.47866e-08	UDP-glucosyltransferase BX9
MZ00001483	0.0141983	-0.154508	-0.715292	0.231644	0.00159555	0.0329131	1.38802e-06	putative glucosyltransferase
MZ00012679	2.17474e-08	-0.277302	-0.955162	1.04017	0.0448102	5.94506e-05	1.05579e-06	Probable hydroquinone glucosyltransferase
MZ00017936	3.47419e-09	1.22209	-0.862308	1.66262	0.0010559	0.394218	9.45871e-11	putative glucosyltransferase
MZ00012710	6.13887e-06	0.904501	0.321564	1.82677	0.0677282	0.00598171	2.7666e-06	putative glucosyltransferase
MZ00056539	6.7506e-09	0.121797	-1.05076	0.928967	0.00201238	0.0218595	1.60181e-09	putative glucosyltransferase
DNA repair and replication
MZ00029688	6.66582e-07	0.0232301	0.282852	-0.331796	0.0313432	0.00360865	3.13522e-07	putative DNA repair protein rhp16
MZ00030882	9.86536e-09	0.00297698	0.594752	-0.597729	0.00243099	0.00204655	6.0993e-09	origin recognition complex subunit 3
MZ00034469	1.03923e-07	0.936375	1.58544	-2.52182	0.254393	5.7189e-06	5.90939e-08	DNA-directed RNA polymerase beta'' chain
MZ00024090	2.6183e-07	0.146478	0.388452	-0.53493	0.177556	0.00010607	6.28472e-06	putative DNA topoisomerase II
MZ00029517	4.93308e-06	0.047276	0.251748	-0.299024	0.0351767	0.000813859	1.53819e-06	HhH-GPD base excision DNA repair protein
MZ00029688	6.66582e-07	0.0232301	0.282852	-0.331796	0.0313432	0.00360865	3.13522e-07	putative DNA repair protein rhp16
MZ00017604	4.23654e-06	0.424851	-0.288441	1.86343	0.0351619	0.00150329	4.21154e-06	MutT/nudix
MZ00027375	2.28674e-07	-0.487787	-0.322856	0.174643	0.0915321	1.59528e-06	3.03804e-06	5' repair endonuclease
MZ00036510	9.92374e-08	-0.0709343	-1.34111	1.41205	0.008724	0.00178999	7.53971e-08	exonuclease
MZ00046736	3.43915e-05	-0.0797303	-0.138003	0.217733	0.280925	0.000112582	9.24209e-06	putative DNA-damage-inducible protein P
MZ00041683	2.07755e-08	0.273226	0.197351	-0.470577	0.521328	2.89163e-08	1.76958e-05	putative DNA damage binding protein 1
Legend: Maize defense genes with significant differential expression were selected for primary analysis. The Experimental p-value indicates the statistical significance of the interaction between the Control, WCR + tetracycline and WCR - tetracycline treatments. The columns under the Relative Expresion heading display the the normalized value for the average expression data of the replicates for …
